# Supplementary material
Source: MDPI journal article supplement (https://www.mdpi.com/2079-6412/13/7/1166)
Supplement: s1 [file s1]

# Supplementary Materials: Corrosion Protection Mechanism Study of Nitrite-Modified CaAl-LDH in Epoxy Coatings

Junhao Xue <sup>1,2</sup>, Jingjing Wang <sup>1,2,\*</sup>, Yanhui Cao <sup>1,2,\*</sup>, Xinyue Zhang <sup>1,2</sup>, Lili Zhang <sup>1,2</sup>, Kaifeng Chen <sup>1,2</sup> and Congshu Huang <sup>1,2</sup>

<sup>1</sup> Luoyang Ship Material Research Institute, Xiamen 361101, China; dnxjh666@163.com (J.X.); ohtlys@sina.cn (X.Z.); xunmengren\_82@126.com (L.Z.); xm725ckf@163.com (K.C.); hcs05@126.com (C.H.)  
<sup>2</sup> Science and Technology on Marine Corrosion and Protection Laboratory, Xiamen 361101, China  
 \* Correspondence: jingjing811014@163.com (J.W.); yanhuicao@yeah.net (Y.C.)

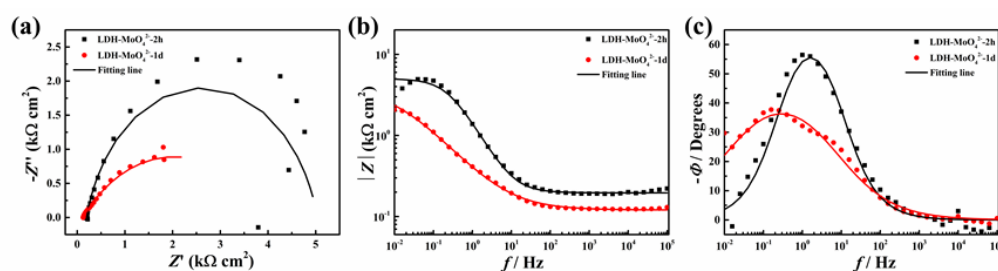

**Figure S1.** The EIS results of carbon steel in 0.02 M NaCl solution with 5g/L LDH-MoO<sub>4</sub><sup>2-</sup>.

**Citation:** Xue, J.; Wang, J.; Cao, Y.; Zhang, X.; Zhang, L.; Chen, K.; Huang, C. Corrosion Protection Mechanism Study of Nitrite-Modified CaAl-LDH in Epoxy Coatings. *Coatings* **2023**, *13*, 1166. <https://doi.org/10.3390/coatings13071166>

Academic Editor: Cecilia Bartuli

Received: 6 June 2023

Revised: 21 June 2023

Accepted: 24 June 2023

Published: 27 June 2023

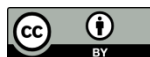

**Copyright:** © 2023 by the authors. Submitted for possible open access publication under the terms and conditions of the Creative Commons Attribution (CC BY) license (<https://creativecommons.org/licenses/by/4.0/>).
